# Supplementary material
Source: ML conference proceedings conference paper supplement (https://www.ecva.net/papers/eccv_2022/papers_ECCV/html/136890035_ECCV_2022_paper.php)
Supplement: Supplementary file 3 [file 136890035-supp.zip]

Archive with 2 entries (2 files):
- Slides_AAFormer_ID1397.pdf
- Supplementary Material_AAFormer_ID1397.pdf
